# Supplementary material for: CoMet: a workflow using contig coverage and composition for binning a metagenomic sample with high precision
Source: PubMed Central journal article supplement (PMC5751405; doi:10.1186/s12859-017-1967-3), 2017-12-28
Supplement: 12859_2017_1967_MOESM1_ESM.pdf [file 12859_2017_1967_MOESM1_ESM.pdf]

## Supplementary Material

Table S1: Recall comparison between CoMet and other contig coverage and/or contig composition based binning methods

| Dataset    | MetaWatt  | MaxBin           | MyCC (default)   | MyCC (coverage)  | CoMet     |
|------------|-----------|------------------|------------------|------------------|-----------|
| sim10_1    | 86.98(4)  | <b>97.51 (1)</b> | 97.47 (2)        | 94.79 (3)        | 82.02 (5) |
| sim10_20x  | 60.61 (5) | <b>99.45 (1)</b> | 77.32 (4)        | 81.33 (3)        | 94.81 (2) |
| sim10_80x  | 62.19 (5) | 95.58 (3)        | 98.55 (2)        | <b>98.64 (1)</b> | 81.38 (4) |
| sim30_CAMI | 69.42 (5) | 87.35 (3)        | <b>87.86 (1)</b> | <b>87.86 (1)</b> | 74.51 (4) |

Recall values obtained using different binning methodologies. Binning methods are ranked based on their recall with different datasets with their rank given in parentheses. Bold values indicate the highest of the recall values

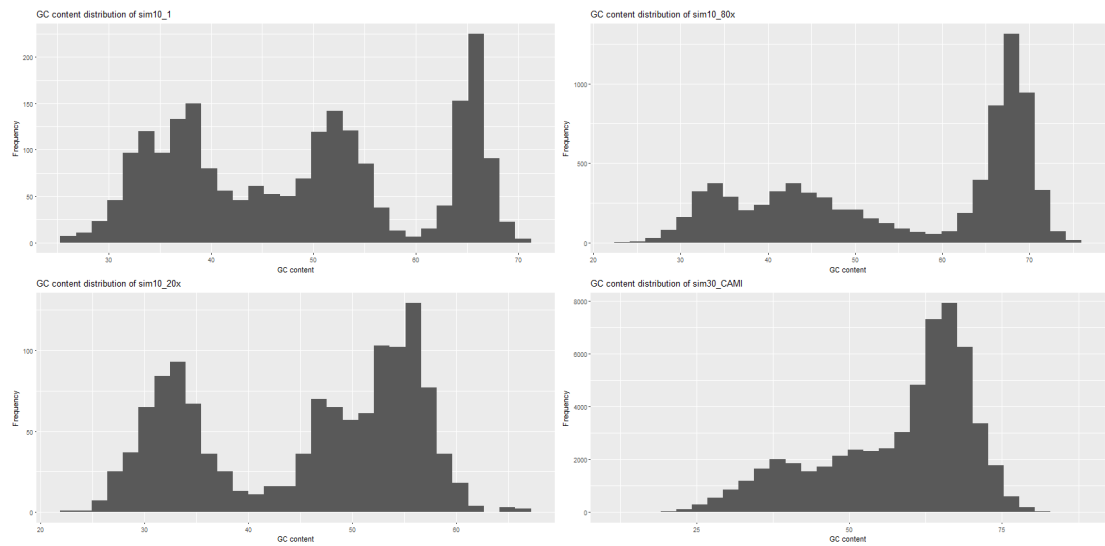

Figure S1: GC content distributions of the contigs in the simulated datasets considered in the study

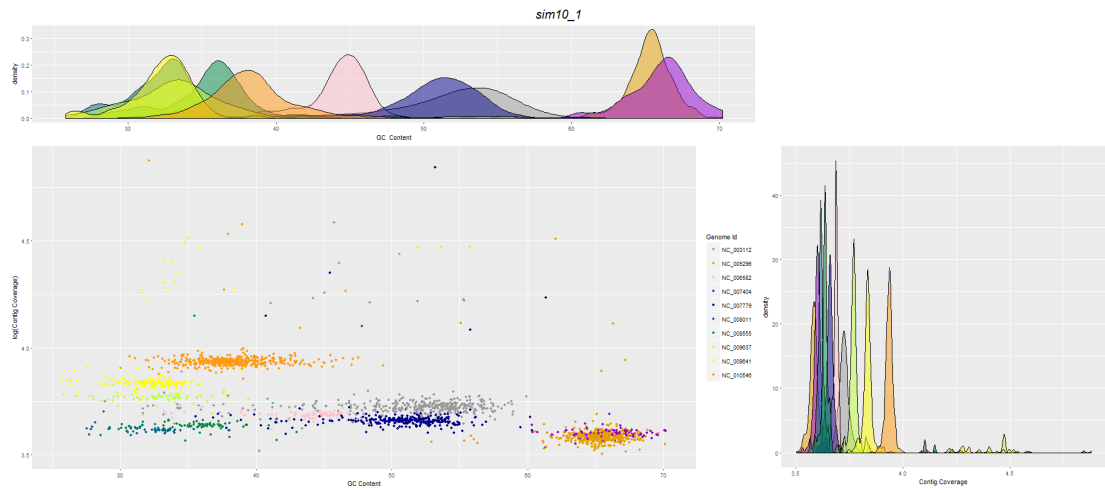

Figure S2: GC-log(coverage) distribution of sim10\_1 dataset

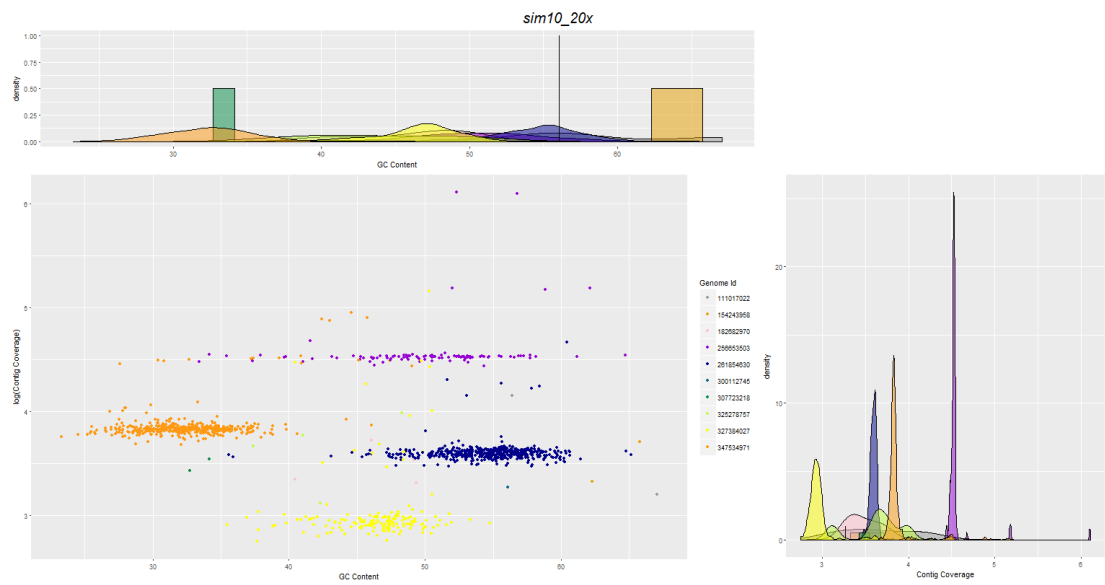

Figure S3: GC-log(coverage) distribution of sim10\_20x dataset

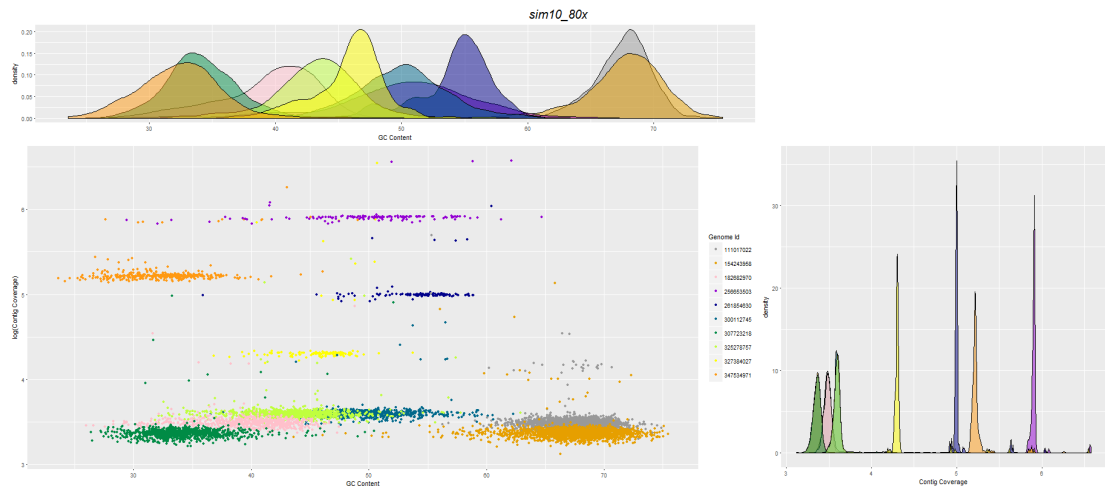

Figure S4: GC-log(coverage) distribution of *sim10\_80x* dataset

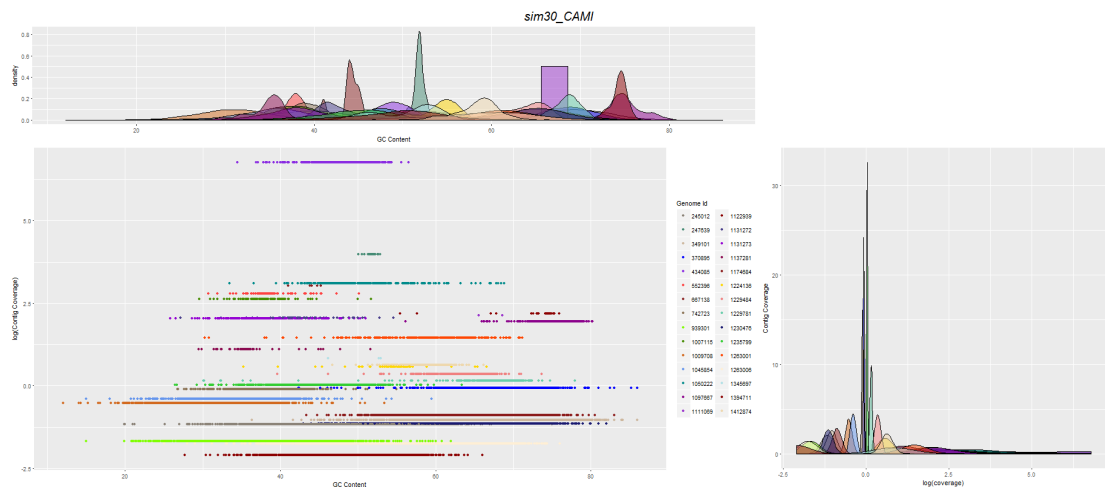

Figure S5: GC-log(coverage) distribution of *sim30\_CAMI* dataset
